# Supplementary material for: A Novel Hemocyte-Specific Small Protein Participates in White Spot Syndrome Virus Infection via Binding to Viral Envelope Protein
Source: MDPI journal article supplement (doi:10.3390/v15010227), 2023-01-13
Supplement: s1 [file s1]

Supplementary Table S1. Primer sequences used in the functional study of LvHSSP genes

| Name                                         | Sequence (5'-3')                                         |
|----------------------------------------------|----------------------------------------------------------|
| <b>cDNA cloning</b>                          |                                                          |
| LvHSSP-F                                     | GGGAGTGTGTTTGTGGCACTG                                    |
| LvHSSP-R                                     | TCACTTGCCAGTCACAATCTG                                    |
| <b>RT-PCR and qPCR</b>                       |                                                          |
| 18S-qF                                       | TATACGCTAGTGGAGCTGGAA                                    |
| 18S-qR                                       | GGGGAGGTAGTGACGAAAAAT                                    |
| LvHSSP-qF                                    | GGCATCTAAGTTGGGCTAAG                                     |
| LvHSSP-qR                                    | CTCCGCAAAGGTTATGTTTT                                     |
| VP28-qF                                      | AAACCTCCGCATTCCTGTGA                                     |
| VP28-qR                                      | TCCGCATCTTCTTCCTTCAT                                     |
| <b>RNAi</b>                                  |                                                          |
| LvHSSP-dsF                                   | <u>TAATACGACTCACTATAGGGGCTTCACTGGGCTCTGAAG</u>           |
| LvHSSP-dsR                                   | <u>TAATACGACTCACTATAGGGCTTGCCAGTCACAATCTGTTTA</u>        |
| EGFP-dsF                                     | <u>TAATACGACTCACTATAGGGCAGTGCTTCAGCCGCTACCC</u>          |
| EGFP-dsR                                     | <u>TAATACGACTCACTATAGGGAGTTCACCTTGATGCCGTTCTT</u>        |
| <b>Protein expression</b>                    |                                                          |
| LvHSSP-pMAL-His-F                            | TCACATATGTCCATGGCTTCACTGGGCTCTGAAG                       |
| LvHSSP-pMAL-His-R                            | TACCTGCAGGGAATTCTCAGTGATGATGATGATGCTTGCCAGTCACAATCTGTTTA |
| <b>Mutant construction</b>                   |                                                          |
| HSSP <sup>WT</sup> -GFP-F                    | CTTGGTACCGAGCTCGGATCCATGACGCGTGTGATGTTCC                 |
| HSSP <sup>WT</sup> -GFP-R                    | GCCCTTGCTCACCATGGATCCCTTGCCAGTCACAATCTGTTTA              |
| HSSP <sup>SPmut</sup> -GFP-F1                | GCGGTGGTCGCTGCTTTCGCCATCTGTGCCGAGTGGGCTT                 |
| HSSP <sup>SPmut</sup> -GFP-F2                | ATGACGCGTGTGATGTTTCCTGGCGGTGGTCG                         |
| GFP <sup>mut</sup> -F                        | AGGAAGCTTGGTACCGAGCTCGGATCCATTGTTAGCAAGG                 |
| GFP <sup>mut</sup> -R                        | TGCTGGATATCTGCAGAATTCCACTTGTACAGCTCGTCCATG               |
| ORF-GFP <sup>mut</sup> -F                    | CTTGGTACCGAGCTCGGATCCATGACGCGTGTGATGTTCC                 |
| ORF-GFP <sup>mut</sup> -R                    | GCCCTTGCTAACAATGGATCCCTTGCCAGTCACAATCTGTTTA              |
| 5'&ORF-GFP <sup>mut</sup> -F                 | CTTGGTACCGAGCTCGGATCCGGGAGTATGCTTGTGGCGCTG               |
| 5'&ORF-GFP <sup>mut</sup> -R                 | GCCCTTGCTAACAATGGATCCCTTGCCAGTCACAATCTGTTTA              |
| 5'&ORF <sup>mut</sup> -GFP <sup>mut</sup> -F | GCAGCCATTACGCGTGTGATGTTTCCTG                             |
| 5'&ORF <sup>mut</sup> -GFP <sup>mut</sup> -R | ACGCGTAATGGCTGCGTTGCTTCAGAA                              |
| <b>Co-Immunoprecipitation</b>                |                                                          |
| pDHsp70-HSSP <sup>WSP</sup> -F               | CTTGGTACCGAGCTCGGATCCATGGCTTCACTGGGCTCTGAAG              |
| pDHsp70-HSSP <sup>WSP</sup> -R               | TGCTGGATATCTGCAGAATTCCACTTGCCAGTCACAATCTGTTTA            |
| pDHsp70-VP19-F                               | CTTGGTACCGAGCTCGGATCCATGGCCACCACGACTAAC                  |
| pDHsp70-VP19-R                               | TGCTGGATATCTGCAGAATTCCACTGCCTCCTCTTGGGGTA                |
| pDHsp70-VP24-F                               | CTTGGTACCGAGCTCGGATCCATGCACATGTGGGGGGT                   |

---

|                |                                              |
|----------------|----------------------------------------------|
| pDHsp70-VP24-R | TGCTGGATATCTGCAGAATTCCATTTTTCCCCAACCTTAAACAG |
| pDHsp70-VP26-F | CTTGGTACCGAGCTCGGATCCATGGAATTGGCAACCTA       |
| pDHsp70-VP26-R | TGCTGGATATCTGCAGAATCCACTTCTTCTTGATTTCGTCCT   |
| pDHsp70-VP28-F | CTTGGTACCGAGCTCGGATCCATGGATCTTTCTTTCACTCTT   |
| pDHsp70-VP28-R | TGCTGGATATCTGCAGAATCCACTCGGTCTCAGTGCCAG      |

---
